# Supplementary material for: Controllable phase transition dependent photoinduced charge separation in CuFe2O4 for photocatalytic hydrogen evolution
Source: Royal Society of Chemistry journal article supplement (doi:10.1039/d4qi01085j), 2024-01-01
Supplement: d4qi01085j1.pdf [file d4qi01085j1.pdf]

## Supplementary Information

# Controllable phase transition dependent photoinduced charge separation in $\text{CuFe}_2\text{O}_4$ for photocatalytic hydrogen evolution

Dongfen Hou, ‡ Jingqi Tian, ‡ Jingying Wei, Dailing Jia, Ke Ma, Huaiguo Xue and Tengfei Jiang\*

School of Chemistry and Chemical Engineering, and Institute for Innovative Materials and Energy, Yangzhou University, 180 Si-Wang-Ting Road, Yangzhou

225002, P. R. China;

\*Corresponding Author

Email: [jiangtengfei@yzu.edu.cn](mailto:jiangtengfei@yzu.edu.cn)

## Materials

All the chemicals used in this study were of analytical grade and used without further purification. Iron(III) nitrate nonahydrate ( $\text{FeNO}_3 \cdot 9\text{H}_2\text{O}$ ), Copper(II) Nitrate Trihydrate ( $\text{CuNO}_3 \cdot 3\text{H}_2\text{O}$ ), Citric acid ( $\text{C}_6\text{H}_8\text{O}_7$ ), Urea ( $\text{CH}_4\text{NO}_2$ ) were purchased from Sigma-Aldrich Pte. Ltd. (Singapore). The water used throughout all experiments was purified using a Millipore system.

## Structural characterisation and performance testing

Scanning electron microscopy (SEM) and X-ray spectroscopy (EDS): The micro-surface morphology of  $\text{CuFe}_2\text{O}_4$  was observed by field emission scanning electron microscopy (FESEM) using an accelerating voltage of 5 kV.

Scanning Electron Microscopy (SEM) and X-ray Spectroscopy (EDS): The micro-surface morphology of  $\text{CuFe}_2\text{O}_4$  was observed by SEM using an accelerating voltage of 5 kV. The energy spectra of the material were scanned using a voltage of 20 kV.

X-ray diffraction (XRD): X-ray diffraction was used to characterise the crystal structure of the powders with diffraction angles ( $2\theta$ ) ranging from  $10^\circ$  to  $80^\circ$  at a scanning rate of  $2^\circ\text{-min}^{-1}$ . UV-vis-NIR: The absorbance of the material was scanned by UV-vis-NIR spectrometry at wavelengths of 200-2000 nm. X-ray photoelectron spectroscopy (XPS): The chemical composition and state of the material surface were tested by X-ray photoelectron spectroscopy. The sample powder (20 mg) was pressed and cut to a size of about  $5 \times 5$  mm and adhered to a sample tray with double-sided adhesive, and a neutralisation gun was used to eliminate uneven charging and poor conductivity by using a monochromated Al K- $\alpha$  target (1486.6 eV), and the tests were carried out within the full-energy and narrow-energy spectra of 150 eV and 30 eV, with step sizes of 1 eV and 0.05 eV, respectively, and the results were obtained by C 1s spectroscopy. The results were corrected by the 284.8 eV peak of the C 1s spectrum.

Photoelectrochemical tests: the photoelectrochemical responses of these photocatalysts were recorded on an Autolab electrochemical workstation using a 500 W xenon lamp with a light intensity of  $100 \text{ mW/cm}^2$ . Working electrodes were fabricated using the drop-coating method. The photocatalyst sample (8 mg) was added to ethylene glycol methyl ether (3 mL) and sonicated for 30 min. The sample suspension was then drop-coated onto a fluorine-doped tin oxide (FTO,  $1 \times 3 \text{ cm}^2$ ) substrate and heated at  $90^\circ\text{C}$  until the solution evaporated to form a film. Then the film was burned in a tube furnace at  $200^\circ\text{C}$  for 30 min under nitrogen atmosphere with a heating rate of  $3^\circ\text{C/min}$ . The photoelectrochemical properties were tested in  $0.5 \text{ mol/L Na}_2\text{SO}_4$  electrolyte with a platinum wire and saturated Ag/AgCl as counter electrode and reference electrode, respectively.

The intensity of steady-state photoluminescence (PL) spectra was used to qualitatively monitor the separation or complexation efficiency of the photocatalysts, and surface

photovoltaic spectroscopy (SPV) provides information on the variation of surface photovoltaics with respect to the energy of the incident photons. The surface photovoltaic spectroscopy test system was implemented based on a lock-in amplifier, which consisted of a 500 W xenon lamp source (CHF-XM500, Beijing Trusttech Co. Ltd.), a monochromator (SBP500, Zolix), a lock-in amplifier (SR830, Stanford Research Systems, Inc.), a modulation fan (SR540, Stanford Research Systems, Inc.), and a sample cell. The monochromator was modulated at 23 Hz, and its intensity depended on the intensity energy distribution of the xenon lamp source used. The monochromator and lock-in amplifier were controlled by a computer, and the input impedance of the lock-in amplifier was 10 M $\Omega$ . The surface photovoltaic spectrum is swept from long to short waves during scanning, and a UV cut-off filter ( $\lambda > 420$  nm) is used to remove the octave light generated by the grating monochromator when the wavelength of the monochromatic light is greater than 600 nm. The entire test system was calibrated with a silicon detector (DSI200, Zolix) to eliminate phase differences caused by the non-photovoltaic response, so that the measured phase values truly reflect the kinetic characteristics of the photovoltaic signal.

Photocatalytic reaction: 10 mg of photocatalyst (without co-catalyst) was dispersed in 9 mL of aqueous solution, 1 mL of methanol was used as a sacrificial agent, and nitrogen was used to replace the gas for 5 min. The suspension was continuously stirred for 4 h during the photocatalytic reaction, and the bottom was irradiated by a 500 W xenon lamp, and detected by a gas chromatograph (GC-2014, Shimadzu, with nitrogen as the carrier gas) using a thermal conductivity detector (TCD). Hydrogen generation. Catalysts deposition was conducted as follow: H<sub>2</sub>PtCl<sub>6</sub> (1 wt% based on Pt atoms) was added into the solution, after irradiated with light for 1 h to ensure Pt was in-situ deposited on the surface of CuFe<sub>2</sub>O<sub>4</sub> and subsequently washing and drying of the catalyst. The dried catalyst is put into the system of photocatalytic hydrogen production.

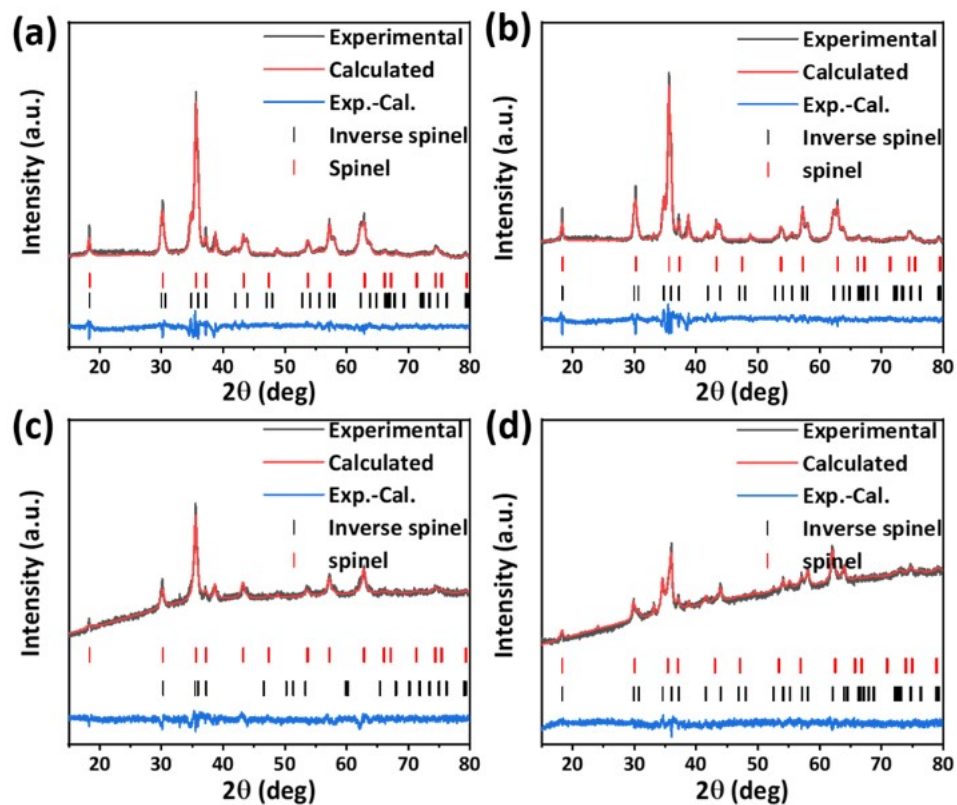

Fig S1.(a) XRD Rietveld analysis of CFO-400;(b) XRD Rietveld analysis of CFO-425;  
(c) XRD Rietveld analysis of CFO-450; (d) XRD Rietveld analysis of CFO-550.

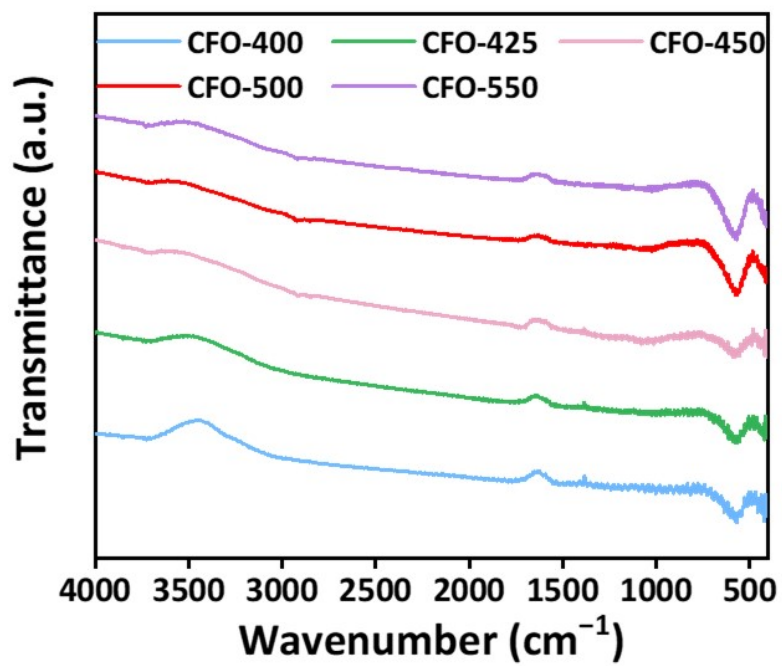

Fig S2. FTIR spectra of CFO-400.CFO-425;CFO-450;CFO-500;CFO-550.

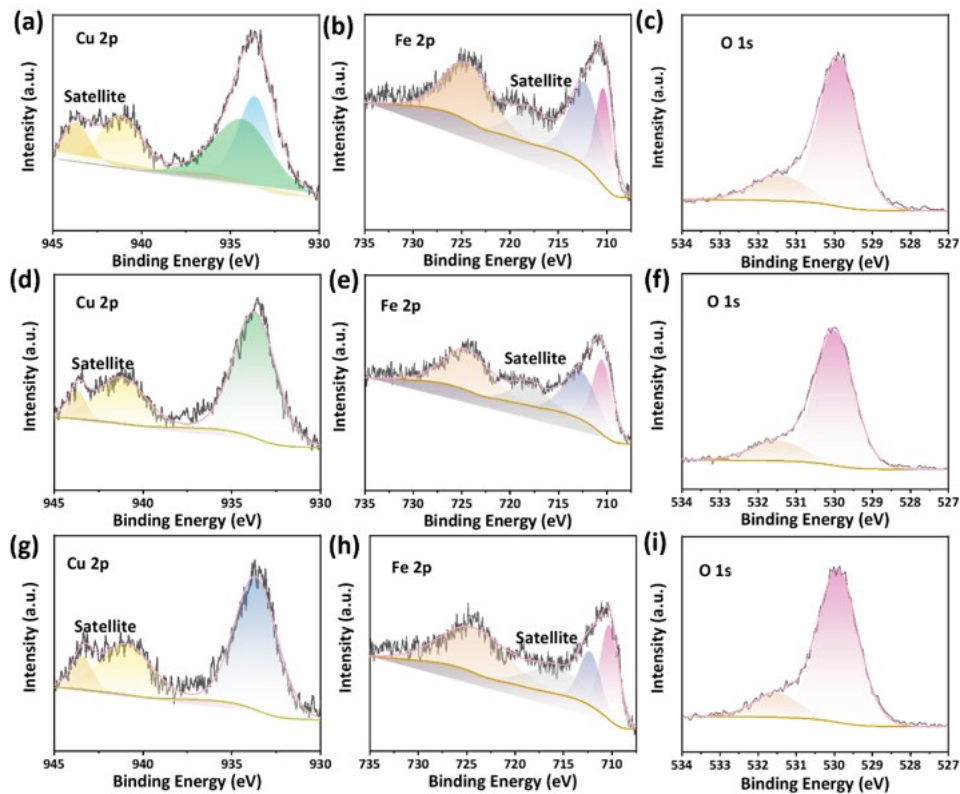

Fig S3.(a) Cu 2p spectrum of CFO-425; (b) Fe 2p spectrum of CFO-425;(c) O 1s spectrum of CFO-425; (d) Cu 2p spectrum of CFO-450; (e) Fe 2p spectrum of CFO-450;(f) O 1s spectrum of CFO-450; (g) Cu 2p spectrum of CFO-550; (h) Fe 2p spectrum of CFO-550;(i) O 1s spectrum of CFO-550.

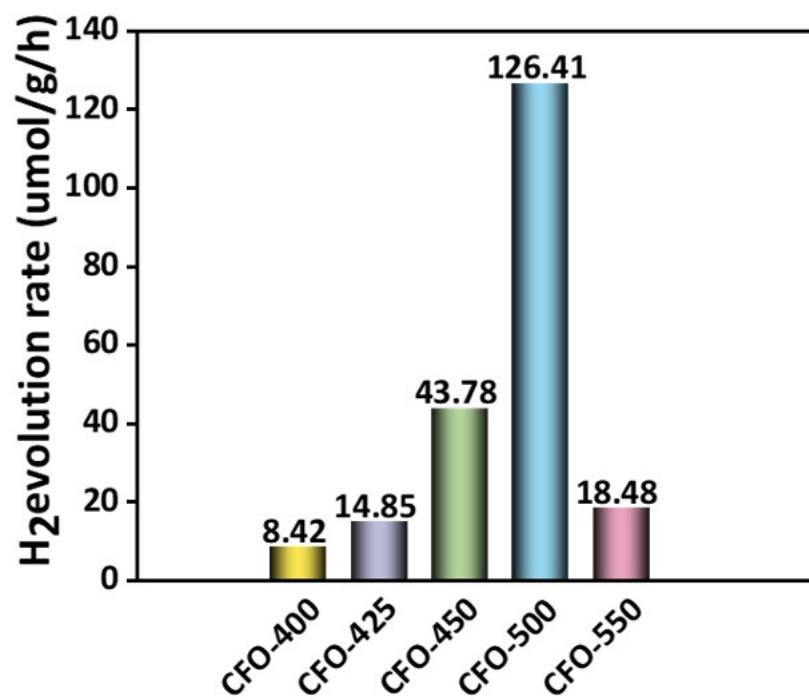

Fig S4. Comparison of catalytic activity of gases produced by different samples.

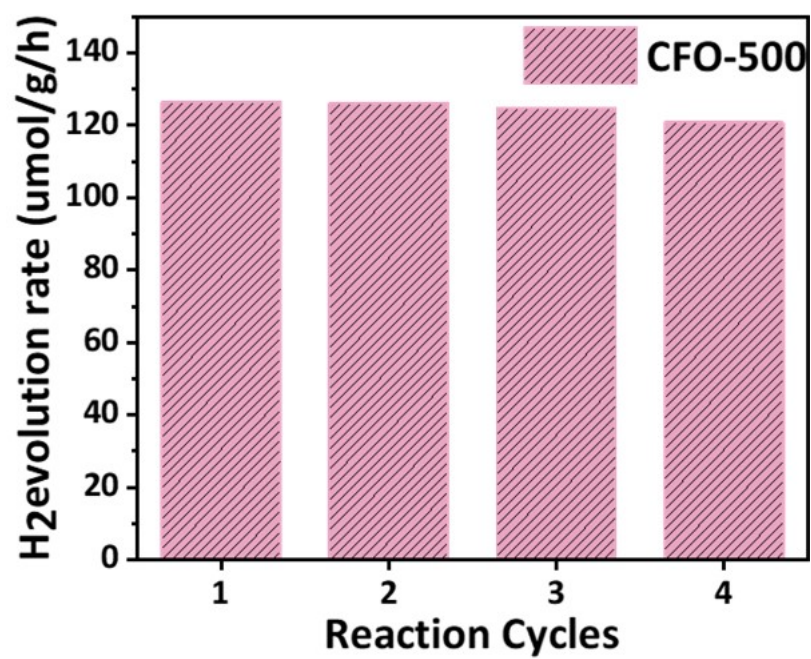

Fig S5. Four consecutive stability tests for hydrogen production from CFO-500 under illumination.



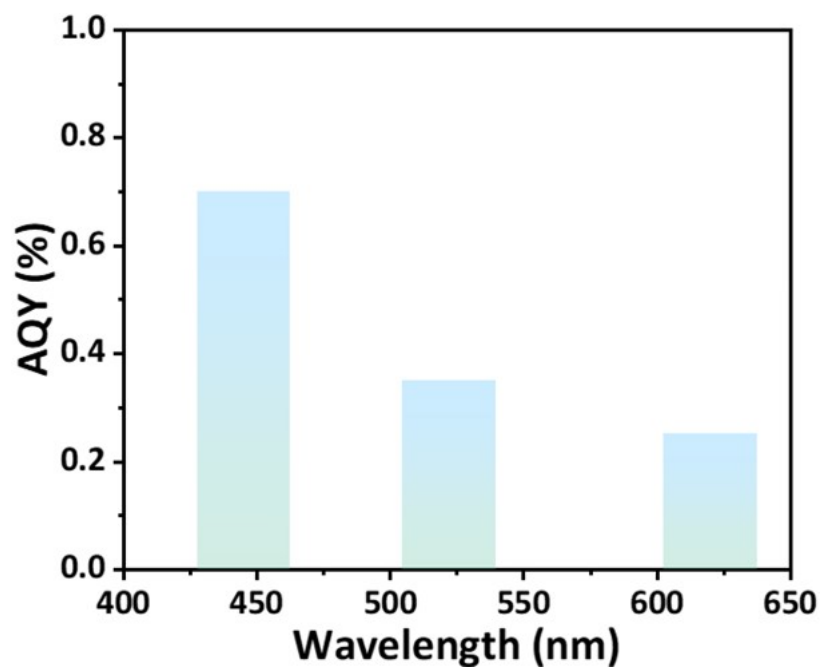

Fig S6. Apparent quantum yield (AQY) of CFO-500.

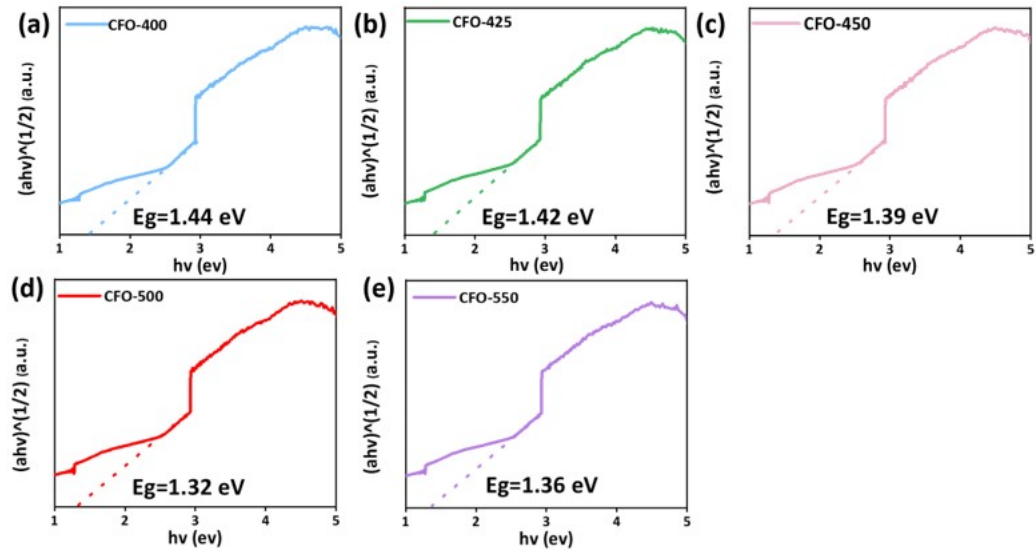

Fig S7. Tauc diagrams for CFO-400, CFO-425, CFO-450, CFO-500, CFO-550, CFO-400.

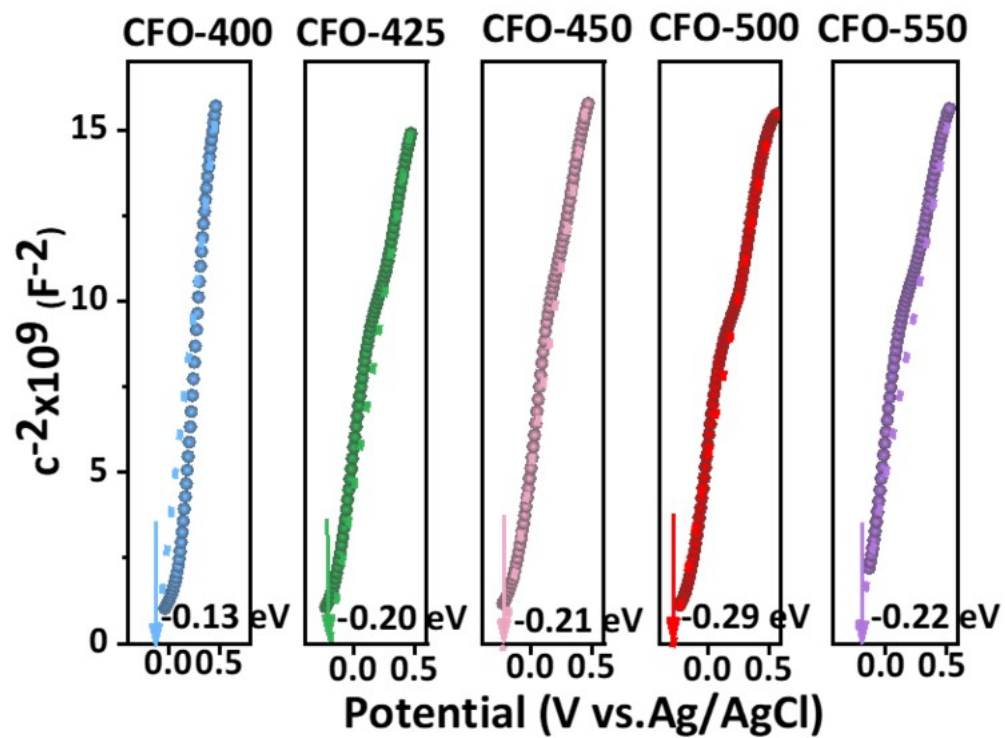

Fig S8. Mott-Schottky plots of CFO-400, CFO-425, CFO-450, CFO-500, CFO-550.

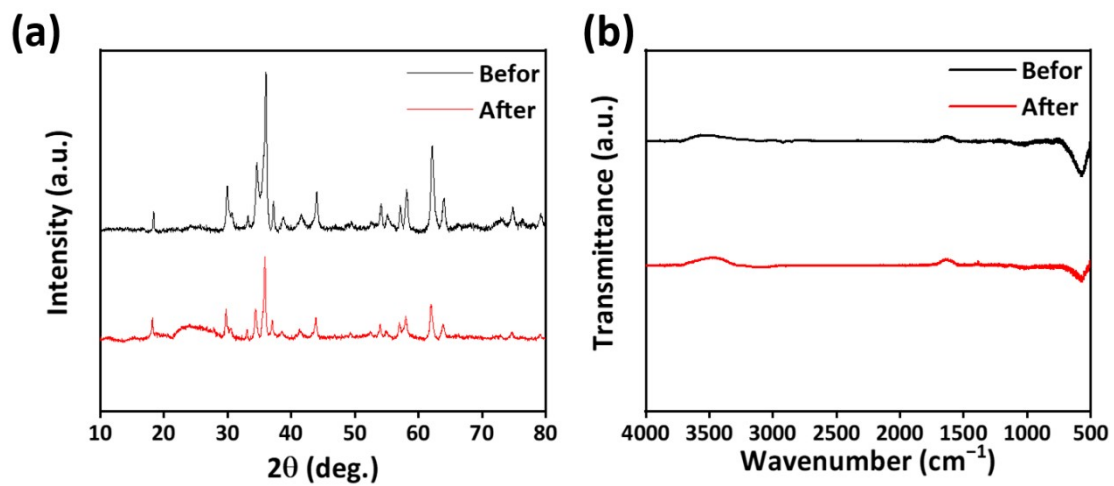

Fig S9. XRD pattern, FT-IR spectra of CFO-500 before and after photocatalytic hydrogen evolution.

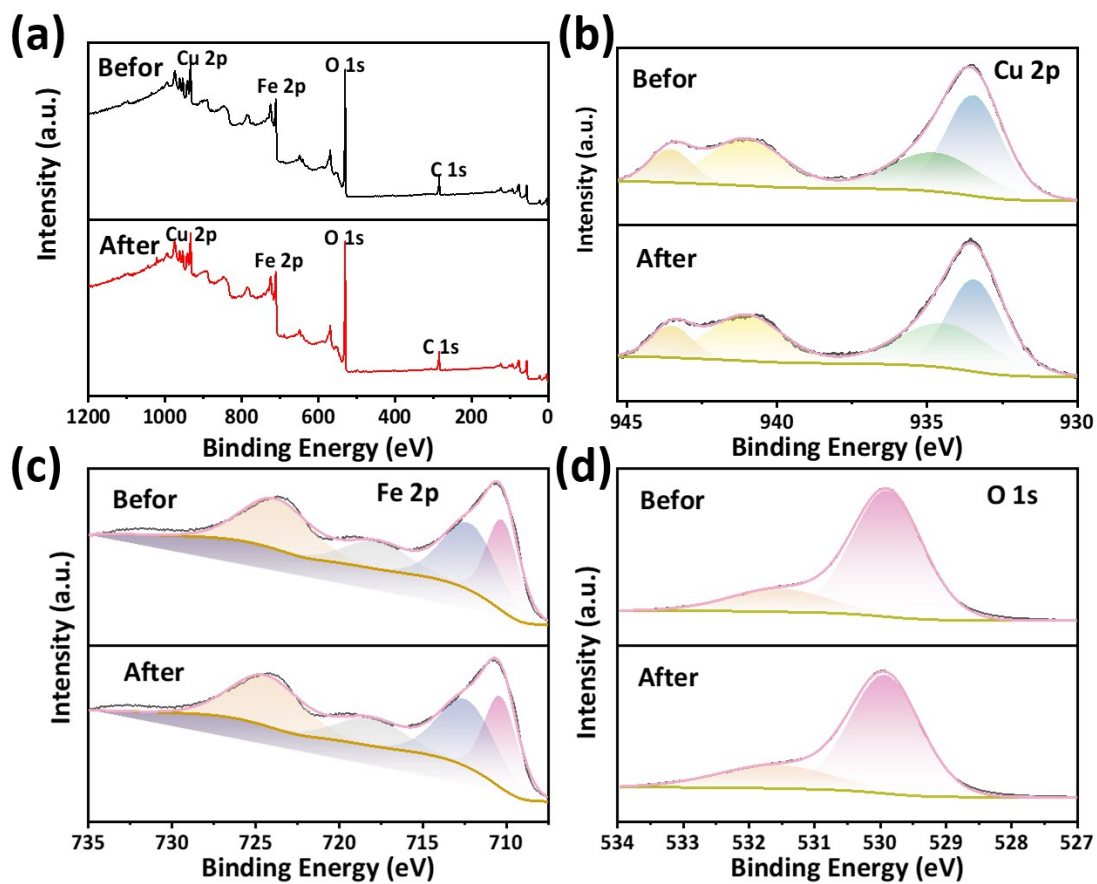

Fig S10. XPS spectra of CFO-500 before and after photocatalytic hydrogen evolution.

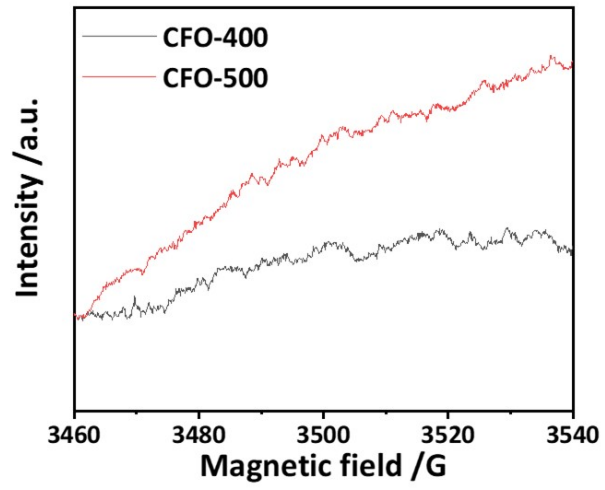

Fig S11. EPR spectra of CFO-400 and CFO-500.

Table S1 Refined structural parameters of CFO.

| T(K)                                            | atom | site | x       | y       | z       |
|-------------------------------------------------|------|------|---------|---------|---------|
| 400                                             | Cu   | 8d   | 0.00000 | 0.00000 | 0.50000 |
|                                                 | Fe1  | 8d   | 0.00000 | 0.00000 | 0.50000 |
|                                                 | Fe2  | 4a   | 0.00000 | 0.75000 | 0.12500 |
|                                                 | O    | 16h  | 0.00000 | 0.01168 | 0.24819 |
| Space group: I41/amd ,Rexp = 1.89%, Rwp =4.55%. |      |      |         |         |         |
| T(K)                                            | atom | site | x       | y       | z       |
| 400                                             | Cu   | 16d  | 0.62500 | 0.62500 | 0.62500 |
|                                                 | Fe1  | 16d  | 0.62500 | 0.62500 | 0.62500 |
|                                                 | Fe2  | 8a   | 0.00000 | 0.00000 | 0.00000 |
|                                                 | O    | 32e  | 0.37731 | 0.37731 | 0.37731 |
| Space group: Fd-3m,Rexp = 1.89%, Rwp =4.55%.    |      |      |         |         |         |
| T(K)                                            | atom | site | x       | y       | z       |
| 425                                             | Cu   | 8d   | 0.00000 | 0.00000 | 0.50000 |
|                                                 | Fe1  | 8d   | 0.00000 | 0.00000 | 0.50000 |
|                                                 | Fe2  | 4a   | 0.00000 | 0.75000 | 0.12500 |
|                                                 | O    | 16h  | 0.00000 | 0.00984 | 0.25192 |
| Space group: I41/amd ,Rexp = 1.88%, Rwp =4.80%. |      |      |         |         |         |
| T(K)                                            | atom | site | x       | y       | z       |
| 425                                             | Cu   | 16d  | 0.62500 | 0.62500 | 0.62500 |
|                                                 | Fe1  | 16d  | 0.62500 | 0.62500 | 0.62500 |
|                                                 | Fe2  | 8a   | 0.00000 | 0.00000 | 0.00000 |
|                                                 | O    | 32e  | 0.37644 | 0.37644 | 0.37644 |
| Space group: Fd-3m,Rexp = 1.88%, Rwp =4.80%.    |      |      |         |         |         |
| T(K)                                            | atom | site | x       | y       | z       |
| 450                                             | Cu   | 8d   | 0.00000 | 0.00000 | 0.50000 |
|                                                 | Fe1  | 8d   | 0.00000 | 0.00000 | 0.50000 |
|                                                 | Fe2  | 4a   | 0.00000 | 0.75000 | 0.12500 |
|                                                 | O    | 16h  | 0.00000 | 0.12772 | 0.0344  |
| Space group: I41/amd ,Rexp = 1.88%, Rwp =4.33%. |      |      |         |         |         |
| T(K)                                            | atom | site | x       | y       | z       |

|     |     |     |         |         |         |
|-----|-----|-----|---------|---------|---------|
| 450 | Cu  | 16d | 0.62500 | 0.62500 | 0.62500 |
|     | Fe1 | 16d | 0.62500 | 0.62500 | 0.62500 |
|     | Fe2 | 8a  | 0.00000 | 0.00000 | 0.00000 |
|     | O   | 32e | 0.36773 | 0.36773 | 0.36773 |

Space group: Fd-3m,Rexp = 1.88%, Rwp =4.33%.

| T(K) | atom | site | x       | y       | z       |
|------|------|------|---------|---------|---------|
| 500  | Cu   | 8d   | 0.00000 | 0.00000 | 0.50000 |
|      | Fe1  | 8d   | 0.00000 | 0.00000 | 0.50000 |
|      | Fe2  | 4a   | 0.00000 | 0.75000 | 0.12500 |
|      | O    | 16h  | 0.00000 | 0.01536 | 0.25839 |

Space group: I41/amd ,Rexp = 1.92%, Rwp =4.95%.

| T(K) | atom | site | x       | y       | z       |
|------|------|------|---------|---------|---------|
| 500  | Cu   | 16d  | 0.62500 | 0.62500 | 0.62500 |
|      | Fe1  | 16d  | 0.62500 | 0.62500 | 0.62500 |
|      | Fe2  | 8a   | 0.00000 | 0.00000 | 0.00000 |
|      | O    | 32e  | 0.35440 | 0.35440 | 0.35440 |

Space group: Fd-3m,Rexp = 1.92%, Rwp =4.95%.

| T(K) | atom | site | x       | y       | z       |
|------|------|------|---------|---------|---------|
| 550  | Cu   | 8d   | 0.00000 | 0.00000 | 0.50000 |
|      | Fe1  | 8d   | 0.00000 | 0.00000 | 0.50000 |
|      | Fe2  | 4a   | 0.00000 | 0.75000 | 0.12500 |
|      | O    | 16h  | 0.00000 | 0.01003 | 0.24964 |

Space group: I41/amd ,Rexp = 1.25%, Rwp =4.69%.

| T(K) | atom | site | x       | y       | z       |
|------|------|------|---------|---------|---------|
| 550  | Cu   | 16d  | 0.62500 | 0.62500 | 0.62500 |
|      | Fe1  | 16d  | 0.62500 | 0.62500 | 0.62500 |
|      | Fe2  | 8a   | 0.00000 | 0.00000 | 0.00000 |
|      | O    | 32e  | 0.36666 | 0.36666 | 0.36666 |

Space group: Fd-3m,Rexp = 1.25%, Rwp =4.69%.



Table S2 Lattice and defective oxygen content of CFO obtained by XPS spectral fitting of O1s.

| Sample  | Lattice O(%) | Defect(%) |
|---------|--------------|-----------|
| CFO-400 | 73.74        | 26.76     |
| CFO-425 | 76.73        | 23.27     |
| CFO-450 | 76.50        | 23.50     |
| CFO-500 | 62.77        | 37.23     |
| CFO-550 | 82.99        | 17.01     |

Table S3 Fitting results of Nyquist plots for samples.

| Sample  | $R_s$ ( $\Omega$ ) | $R_{ct}$ ( $\Omega$ ) | Q(F)                    | n       | C(F)                    |
|---------|--------------------|-----------------------|-------------------------|---------|-------------------------|
| CFO-400 | 34.38              | 2134900               | $4.956 \times 10^{-7}$  | 0.94155 | $4.9734 \times 10^{-7}$ |
| CFO-425 | 18.31              | 879600                | $1.6624 \times 10^{-6}$ | 0.89624 | $1.6800 \times 10^{-6}$ |
| CFO-450 | 22.87              | 143520                | $2.9061 \times 10^{-6}$ | 0.84741 | $2.4827 \times 10^{-6}$ |
| CFO-500 | 40.86              | 132410                | $1.157 \times 10^{-5}$  | 0.83907 | $1.2556 \times 10^{-5}$ |
| CFO-550 | 31.15              | 193620                | $9.7414 \times 10^{-6}$ | 0.90063 | $1.0448 \times 10^{-5}$ |

Table S4 Comparison of band gap, conduction band and valence band of the samples.

| Sample  | $E_g$   | $E_{CB}(\text{vs.NHE})$ | $E_{vB}(\text{vs.NHE})$ |
|---------|---------|-------------------------|-------------------------|
| CFO-400 | 1.44 eV | 0.09 V                  | 1.53 V                  |
| CFO-425 | 1.42 eV | 0.02 V                  | 1.44 V                  |
| CFO-450 | 1.39 eV | 0.01 V                  | 1.40 V                  |
| CFO-500 | 1.32 eV | -0.07V                  | 1.25 V                  |
| CFO-550 | 1.36 eV | 0 V                     | 1.36 V                  |

Table S5 Comparison of photocatalytic HER performance over various photocatalysts and reaction conditions reported in reference.

| Catalysis                                                          | sacrificial agent                                                                 | light source                                      | Activity Rate/ $\mu\text{mol g}^{-1} \text{h}^{-1}$ | Ref.      |
|--------------------------------------------------------------------|-----------------------------------------------------------------------------------|---------------------------------------------------|-----------------------------------------------------|-----------|
| ZnFe <sub>2</sub> O <sub>4</sub>                                   | methanol                                                                          | 300 W xenon lamp                                  | 9.61 $\mu\text{mol g}^{-1}$                         | [1]       |
| TiO <sub>2</sub> @ZnFe <sub>2</sub> O <sub>4</sub>                 | methanol                                                                          | 300 W xenon lamp                                  | 194.61 $\mu\text{mol g}^{-1}$                       | [1]       |
| NiFe <sub>2</sub> O <sub>4</sub>                                   | methanol                                                                          | 250 W mercury vapor lamp                          | 317 $\mu\text{mol g}^{-1}$                          | [2]       |
| CuFe <sub>2</sub> O <sub>4</sub>                                   | 0.25 M Na <sub>2</sub> SO <sub>3</sub><br>– 0.35 Na <sub>2</sub> S                | 300 W xenon lamp                                  | 336 $\mu\text{mol g}^{-1} \text{h}^{-1}$            | [3]       |
| NiFe <sub>2</sub> O <sub>4</sub>                                   | 0.25 M Na <sub>2</sub> SO <sub>3</sub><br>– 0.35 Na <sub>2</sub> S                | 300 W xenon lamp                                  | 234 $\mu\text{mol g}^{-1} \text{h}^{-1}$            | [3]       |
| WO <sub>3</sub> @ NiFe <sub>2</sub> O <sub>4</sub>                 | -                                                                                 | 500 W xenon lamp                                  | 288 $\mu\text{mol g}^{-1} \text{h}^{-1}$            | [4]       |
| CoFe <sub>2</sub> O <sub>4</sub>                                   | TEOA (10vol %)                                                                    | 5W LED                                            | 2.27 $\mu\text{mol h}^{-1}$                         | [5]       |
| CoFe <sub>2</sub> O <sub>4</sub> /<br>NiMoO <sub>4</sub>           | TEOA (10vol %)                                                                    | 5W LED                                            | 16.84 $\mu\text{mol h}^{-1}$                        | [5]       |
| TiO <sub>2</sub> /FePS <sub>3</sub>                                | ethanol                                                                           | 350 W xenon lamp                                  | 99.5 $\mu\text{mol g}^{-1} \text{h}^{-1}$           | [6]       |
| TiN/N-TiO <sub>2</sub>                                             | AA                                                                                | 300 W xenon lamp                                  | 703 $\mu\text{mol h}^{-1}$                          | [7]       |
| Pt-VO-TiO <sub>2</sub>                                             | TEOA                                                                              | 300 W xenon lamp                                  | 64.5 $\text{mmol g}^{-1} \text{h}^{-1}$             | [8]       |
| CeCo1:2/P                                                          | TEOA                                                                              | 5W LED                                            | 486.99 $\mu\text{mol}$                              | [9]       |
| Ru/g-C <sub>3</sub> N <sub>4</sub> -x                              | -                                                                                 | Xe lamp irradiation<br>(200 mW·cm <sup>-2</sup> ) | 6.42 $\text{mmol g}^{-1} \text{h}^{-1}$             | [12]      |
| ZnIn <sub>2</sub> S <sub>4</sub> /Mo <sub>2</sub> TiC <sub>2</sub> | TEOA                                                                              | 300 W xenon lamp                                  | 3.12 $\text{mmol g}^{-1} \text{h}^{-1}$             | [13]      |
| ZnIn <sub>2</sub> S <sub>4</sub> /TiO <sub>2-x</sub>               | methanol                                                                          | 300 W xenon lamp                                  | 581.1 $\mu\text{mol g}^{-1} \text{h}^{-1}$          | [14]      |
| Cu <sub>2</sub> WS <sub>4</sub> /NiTiO <sub>3</sub>                | 0.35 mol/L<br>Na <sub>2</sub> S and 0.35<br>mol/L Na <sub>2</sub> SO <sub>3</sub> | 300 W xenon lamp                                  | 810 $\mu\text{mol g}^{-1} \text{h}^{-1}$            | [15]      |
| CdS/np-rGO                                                         | 0.35 mol/L Na <sub>2</sub> S<br>and Na <sub>2</sub> SO <sub>3</sub>               | 300 W xenon lamp                                  | 2171.23 $\mu\text{mol g}^{-1} \text{h}^{-1}$        | [16]      |
| CuFe <sub>2</sub> O <sub>4</sub>                                   | methanol                                                                          | 300 W xenon lamp                                  | 126.41 $\mu\text{mol g}^{-1} \text{h}^{-1}$         | This work |

Table S6 photocatalytic H<sub>2</sub> evolution rates of CFO-500 and CFO-500/Pt.

| Samples    | H <sub>2</sub> evolution rates (μmolg <sup>-1</sup> h <sup>-1</sup> ) |
|------------|-----------------------------------------------------------------------|
| CFO-500    | 126.41                                                                |
| CFO-500/Pt | 286.20                                                                |

## Calculation

The measurement of apparent quantum efficiency The apparent quantum efficiency (AQE) was also tested under the similar photocatalytic reaction conditions except that the light source was equipped with different band-pass filters for different wavelengths. The amount of the CFO-500. sample was 10 mg. The respective AQE was figured out by the following formula: amount of reacted electrons

$$\begin{aligned} \text{AQE} &= \frac{2 \text{ number of hydrogen molecules}}{\text{number of incident photons}} \times 100\% \\ &= \frac{1.2 \times 10^8 \times v \times K}{1 \times A \times \lambda} \times 100\% \end{aligned}$$

Where H<sub>2</sub>Ns, E, and hv represent hydrogen evolution amount, Avogadro constant, light energy in the testing time and irradiation area, and photon energy, respectively.

The equivalent capacitance of the CPE element in R||C is: C=(R × Q)<sup>1/n</sup> /R

## DFT Calculation.

The electronic structure of the system was investigated based on the DFT approach with the CASTEP program. Structure was optimized at the generalized gradient approximation (GGA) level with the Perdew–Burke–Ernzerhof (PBE)

exchange–correlation functional and ultrasoft pseudopotentials. To obtain the density of states (DOS) of CuFe<sub>2</sub>O<sub>4</sub>, For geometry optimization, ultrasoft pseudopotentials were used with a kinetic energy cutoff of 351 eV and a G-centered 2 × 2 × 1 k-point mesh for sampling the Brillouin zone. During optimization, the lattice parameters were fixed and only the atoms were allowed to relax. The vacuum layer of the models is set at 15 Å to minimize the interaction between the periodic images.

The d-band centers (ε<sub>d</sub>) were calculated using the following formula:

$$\frac{\int E D_d(E) dE}{\int D_d(E) dE}$$

where D<sub>d</sub>(E) represents the density of states (DOS) for the d-orbital. The integration ranges for all calculations were set from 0 eV to 5 eV. we calculated the d-band center of the Fe3d metal atoms and the Cu3d metal atoms.

## Reference

- 1 D. Zeng, J. Wang, Y. Xie, Y. Ling, J. Zhao, H. Ye and T. Chen, TiO<sub>2</sub>@ZnFe<sub>2</sub>O<sub>4</sub> heterojunctions for efficient photocatalytic degradation of persistent pollutants and hydrogen evolution, *Materials Chemistry and Physics*, 2022, **277**, 125462.
- 2 J. L. Domínguez-Arvizu, J. A. Jiménez-Miramontes, J. M. Salinas-Gutiérrez, M. J. Meléndez-Zaragoza, A. López-Ortiz and V. Collins-Martínez, Optical properties determination of NiFe<sub>2</sub>O<sub>4</sub> nanoparticles and their photocatalytic evaluation towards hydrogen production, *International Journal of Hydrogen Energy*, 2017, **42**, 30242–30248.
- 3 A. Soto-Arreola, A. M. Huerta-Flores, J. M. Mora-Hernández and L. M. Torres-Martínez, Comparative study of the photocatalytic activity for hydrogen evolution of MFe<sub>2</sub>O<sub>4</sub> (M = Cu, Ni) prepared by three different methods, *Journal of Photochemistry and Photobiology A: Chemistry*, 2018, **357**, 20–29.
- 4 M. B. Tahir, Microbial photoelectrochemical cell for improved hydrogen evolution using nickel ferrite incorporated WO<sub>3</sub> under visible light irradiation, *International Journal of Hydrogen Energy*, 2019, **44**, 17316–17322.
- 5 L. Li, J. Xu, S. Zhao, M. Mao and X. Li, Construction of p-n type heterojunction for effective photo-generated electron separation and visible light hydrogen evolution, *International Journal of Hydrogen Energy*, 2021, **46**, 1934–1944.
- 6 B. Xia, B. He, J. Zhang, L. Li, Y. Zhang, J. Yu, J. Ran and S.-Z. Qiao, TiO<sub>2</sub>/FePS<sub>3</sub> S-Scheme Heterojunction for Greatly Raised Photocatalytic Hydrogen Evolution, *Advanced Energy Materials*, 2022, **12**, 2201449.
- 7 D. Liu, Z. Yan, P. Zeng, H. Liu, T. Peng and R. Li, In situ grown TiN/N-TiO<sub>2</sub> composite for enhanced photocatalytic H<sub>2</sub> evolution activity, *Front. Energy*, 2021, **15**, 721–731.
- 8 F. Dai, M. Zhang, M. Mi, Z. Li, J. Xing and L. Wang, Pt-surface oxygen vacancies coupling accelerated photo-charge extraction and activated hydrogen evolution, *Nano Res.*, 2023, **16**, 4736–4741.
- 9 T. Li, L. Zhang, X. Li, X. Wang and Z. Jin, Design and synthesis of phosphating bimetallic CeCo-MOF for substantially improved photocatalytic hydrogen evolution, *J. Mater. Chem. C*, 2022, **10**, 8750–8761.
- 10 Q. Yang, T. Wang, Z. Zheng, B. Xing, C. Li and B. Li, Constructing interfacial active sites in Ru/g-C<sub>3</sub>N<sub>4</sub>-x photocatalyst for boosting H<sub>2</sub> evolution coupled with selective benzyl-alcohol oxidation, *Applied Catalysis B: Environmental*, 2022, **315**, 121575.
- 11 Q. Xi, F. Xie, J. Liu, X. Zhang, J. Wang, Y. Wang, Y. Wang, H. Li, Z. Yu, Z. Sun, X. Jian, X. Gao, J. Ren, C. Fan and R. Li, In Situ Formation ZnIn<sub>2</sub>S<sub>4</sub>/Mo<sub>2</sub>TiC<sub>2</sub> Schottky Junction for Accelerating Photocatalytic Hydrogen Evolution Kinetics: Manipulation of Local

- Coordination and Electronic Structure, *Small*, 2023, **19**, 2300717.
- 12 D. Zhang, M. Wang, G. Wei, R. Li, N. Wang, X. Yang, Z. Li, Y. Zhang and Y. Peng, High visible light responsive ZnIn<sub>2</sub>S<sub>4</sub>/TiO<sub>2-x</sub> induced by oxygen defects to boost photocatalytic hydrogen evolution, *Applied Surface Science*, 2023, **622**, 156839.
  - 13 D. Peng, Y. Wang, H. Shi, W. Jiang, T. Jin, Z. Jin and Z. Chen, Fabrication of novel Cu<sub>2</sub>WS<sub>4</sub>/NiTiO<sub>3</sub> heterostructures for efficient visible-light photocatalytic hydrogen evolution and pollutant degradation, *Journal of Colloid and Interface Science*, 2022, **613**, 194–206.
  - 14 C. Yuan, H. Lv, Y. Zhang, Q. Fei, D. Xiao, H. Yin, Z. Lu and Y. Zhang, Three-dimensional nanoporous heterojunction of CdS/np-rGO for highly efficient photocatalytic hydrogen evolution under visible light, *Carbon*, 2023, **206**, 237–245.
  - 15 Y. Shen, D. Li, Y. Dang, J. Zhang, W. Wang and B. Ma, A Ternary Calabash Model Photocatalyst (Pd/MoP)/CdS for Enhancing H<sub>2</sub> Evolution under Visible Light Irradiation. *Applied Surface Science* 2021, **564**, 150432.
  - 16 C. H. Hsu and F. Mansfeld, Technical Note: Concerning the Conversion of the Constant Phase Element Parameter Y<sub>0</sub> into a Capacitance, *Corrosion*, 2001, **57**, 747–748.
